# Supplementary material for: A macroscopic link between interhemispheric tract myelination and cortico-cortical interactions during action reprogramming
Source: PubMed Central journal article supplement (PMC9307658; doi:10.1038/s41467-022-31687-5), 2022-07-22
Supplement: 41467_2022_31687_MOESM3_ESM.pdf [file 41467_2022_31687_MOESM3_ESM.pdf]

## Description of Additional Supplementary Files

**Supplementary Movie 1. Tractography of stimulated white matter fibers in 3D.** Group-level map of white matter fibers stimulated in our paradigm, as estimated through DWI-based tractography.
